# Supplementary material
Source: PubMed Central journal article supplement (PMC4754543)
Supplement: mt2015155x1.pdf [file mt2015155x1.pdf]

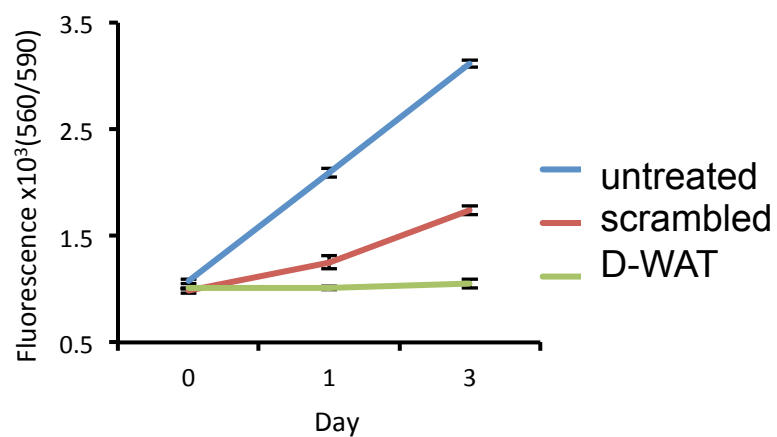

**Supplemental Figure 1. D-WAT but not scrambled hunter killer peptide kills ASC.**

Primary mouse ASC cells treated for 3 hours with 0.05 mM D-WAT or a control KLAKLAK<sub>2</sub> fusion peptide with scrambled WAT7 sequence CWWGSFYK-NH-(CH<sub>2</sub>)<sub>5</sub>-CO-KLAKLAK<sub>2</sub>. Then CellTiter-Blue assay was performed on 3 different days. The scrambled peptide had a significantly lower effect on ASC viability than D-WAT.

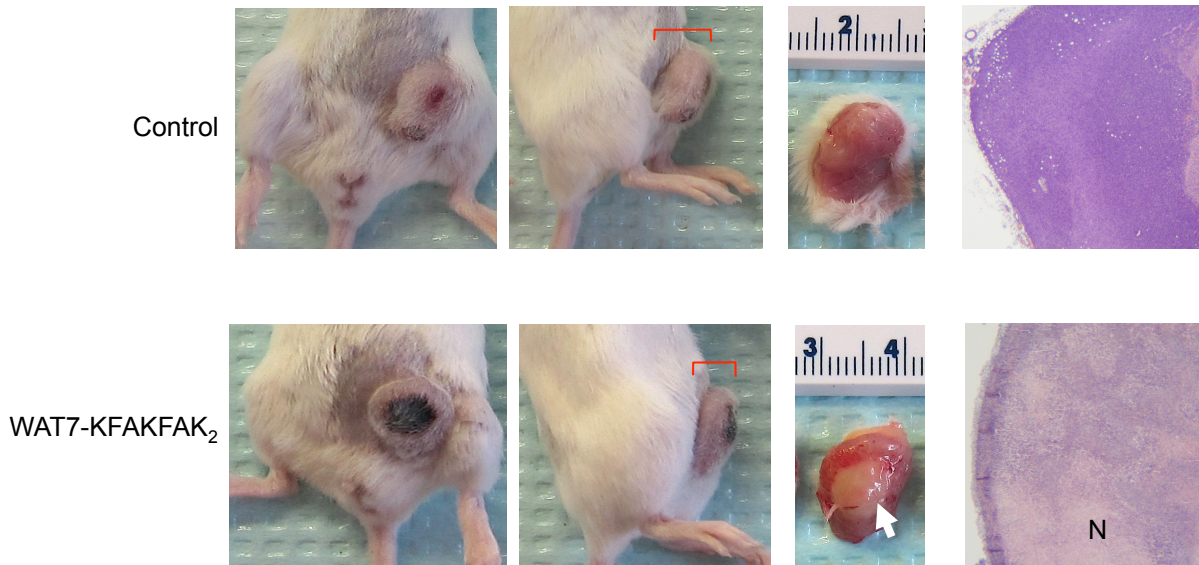

**Supplemental Figure 2. ASC depletion effect in non-obese mouse tumor model.**

Representative tumors from lean BALB/C mice orthotopically grafted with breast carcinoma 4T1.2 cells and injected with PBS (control) or WAT7-KFAKFAK<sub>2</sub>. Note that at 3 weeks peptide treatment induces ulceration and flattening of the tumor (red bracket). Avascular necrotic tumor core is shown (arrow). Tumor necrosis (N) is seen in a hematoxylin/eosin staining of tumor sections (right).
